# **Corrigendum: A mark-recapture estimator of stock sizes from unrefined data applied to a stock of Dover sole (*Solea solea* L.)**

J. W. Horwood and M. D. Nicholson

ICES J. mar. Sci., 48: 33–39. 1991

*J. W. Horwood and M. D. Nicholson: Ministry of Agriculture, Fisheries and Food, Directorate of Fisheries Research, Fisheries Laboratory, Lowestoft, Suffolk NR33 0HT, UK.*

The symmetric information matrix given by Equation (11) (p. 34) was incorrectly presented. The correct form is:

$$\begin{bmatrix} k^{-2}\Sigma_y\Sigma_cR_{yc} & (m_2k)^{-1}\Sigma_yR_{y2} & (m_3k)^{-1}\Sigma_yR_{y3} & \dots & \gamma k^{-1}\Sigma_y\Sigma_c(y.R_{yc}) \\ & m_2^{-2}\Sigma_yR_{y2} & 0 & \dots & \gamma m_2^{-1}\Sigma_y(y.R_{y2}) \\ & & m_3^{-2}\Sigma_yR_{y3} & \dots & \gamma m_3^{-1}\Sigma_y(y.R_{y3}) \\ & & & \ddots & \vdots \\ & & & & \gamma^2\Sigma_y\Sigma_c(y^2.R_{yc}) \end{bmatrix}$$

where  $\gamma = -(1 + \alpha)^{-1}$ .

The calculated values of the variances and covariances in Table 3 (which have to be divided by  $10^3$ ) are correct.
